# Supplementary material
Source: publisher site journal article supplement (https://www.dovepress.com/article/534448)
Supplement: Supplementary file 1 [file 534448-Supplementary%20material.docx]

Supplementary 1 Interview Guide for International Students

**“Exploring Determinants of Well-Being Among International Students”**

Introduction

Thank you for participating in this study. We are keen to learn about the experiences and perspectives of international students at the University of Debrecen concerning their health and well-being, particularly any challenges or difficulties you or other international students may have faced while living and studying in Debrecen. This interview will last approximately 45 to 60 minutes. Do you have any questions before we continue?

Health and wellbeing

| Leading Question | Probing Questions |
| --- | --- |
| Can you tell us what is your thought about health and well-being as international students? | Probe:   1. What kinds of words, description or feelings come to mind? 2. What kinds of feeling are associated with health and wellbeing? 3. What things become difficult when your health and wellbeing are low/compromised? |
| Have you ever experiencing health related problems during your stay and studying in Debrecen? | Probe :   1. What kind of problem? 2. How you manage it? 3. Is it manageable? 4. Who do you normally see if you health related problem? |

Closing

Thank you very much for your time and your participation in this study. Before I end the interview, is there any question you would like to ask?

Supplementary 2 Questionnaire

**Demographic Data**

1.Gender (please tick one)

Female

Male

Others: ……………………………

2. Age: ……………………………

3. Nationality: …………………………….

4. Marital Status (please tick one)

Single

In a relationship

Married

Divorced

Others

5. Level of study: (please tick one)

Bachelor

Master

PhD

1 Tier Degree (Medical and Dentistry)

Others: …………………..

6. Faculty :

Healthcare-related (please specify:………………………………..)

Non-Health care related (please specify:………………………………..)

7. Student’s Status: (please tick one)

First Year

Second Year

Third Year

Fourth Year

Others

8. Sponsorship :

Scholarship (please specify: ………………………………….)

Self sponsor

9. Which, if any, of the following best describes your religion

Christian

Muslim

Jewish

Buddhist

Hindu

Sikh

No Religion

Others:……………………………………..

**Please tick (√ ) to the statement strongly agree, agree, undecided, disagree, or strongly disagree.**

| **No** | **Statement** | **What do you feel?** | | | | |
| --- | --- | --- | --- | --- | --- | --- |
| **Strongly Agree** | **Agree** | **Undecided** | **Disagree** | **Strongly Disagree** |
| **A** | **Academic Life** | | | | | |
| A1 | The quality of support from the university is good |  |  |  |  |  |
| A2 | Communication with students at all levels is good |  |  |  |  |  |
| A3 | Availability of staff sufficient for international student |  |  |  |  |  |
| A4 | Teaching and assessments methods are good |  |  |  |  |  |
| A5 | The effectiveness of teaching is good |  |  |  |  |  |
| A6 | The curriculum is well developed |  |  |  |  |  |
| **H** | **Health Status** | | | | | |
| H1 | I am satisfied with my health |  |  |  |  |  |
| H2 | I enjoy my life in Debrecen |  |  |  |  |  |
| H3 | Access to health care services is good |  |  |  |  |  |
| H4 | Health insurance is good |  |  |  |  |  |
| H5 | I am satisfied with my ability to perform my daily living activities |  |  |  |  |  |
| H6 | I have been feeling good about myself |  |  |  |  |  |
| H7 | I can manage my diet |  |  |  |  |  |
| H8 | I have been feeling confident |  |  |  |  |  |
| **S** | **Social Connectedness** | | | | | |
| S1 | I get support from my international friends |  |  |  |  |  |
| S2 | I get support from local (Hungarian) friends |  |  |  |  |  |
| S3 | I get support from my family |  |  |  |  |  |
| S4 | I fell supported in my workplace |  |  |  |  |  |
| S5 | I can engage in social, cultural, and sports activities |  |  |  |  |  |
| **E** | **Environmental Connectedness** | | | | | |
| E1 | My physical environment is healthy |  |  |  |  |  |
| E2 | It is easy to access to public transport |  |  |  |  |  |
| E3 | It is easy to find accommodation |  |  |  |  |  |
| E4 | It is easy to find a job |  |  |  |  |  |
| E5 | It is easy to find groceries |  |  |  |  |  |
| E6 | It is easy to find school for my children |  |  |  |  |  |
|  | | | | | | |

***This part is to describe your experience while studying and living in Debrecen.***

------- **Thank you for your participation** -------
